# Supplementary material for: Mll5 Is Required for Normal Spermatogenesis
Source: PubMed Central journal article supplement (PMC3206077; doi:10.1371/journal.pone.0027127), 2011-11-01
Supplement: pone.0027127.s004.pdf [file pone.0027127.s004.pdf]

|    | GeneTarget | Primer 1                 | Primer 2                | DetectionUP<br>L probe or<br>SYBR green | KO/WT FCest        | Pr(>Chisq)      | KO/WT FC<br>95% LCL | KO/WT FC<br>95% UCL | KO/WT<br>Abs FCest | KO/WT<br>Abs FC<br>Direction | KO/WT<br>Abs FC<br>95% LCL | KO/WT<br>Abs FC<br>95% UCL |
|----|------------|--------------------------|-------------------------|-----------------------------------------|--------------------|-----------------|---------------------|---------------------|--------------------|------------------------------|----------------------------|----------------------------|
| 1  | Tlk2       | ctcaggaaacaggcatcagg     | tgtctgaacgtgtctgaagga   | UPL17                                   | 0.094649768        | <b>1.91E-13</b> | 0.064136            | 0.139681            | 10.56527           | Down                         | 7.159192                   | 15.59182                   |
| 2  | Utx        | ctgagaggttcatgaagatgg    | gagattcgtagcagcgaaca    | UPL3                                    | 0.59499958         | <b>0.00082</b>  | 0.447026            | 0.791956            | 1.680673           | Down                         | 1.262697                   | 2.237008                   |
| 3  | Rps29      | ctgaaggcaagatgggtca      | gcacatgttcagcccgatt     | UPL109                                  | 0.324657825        | <b>0.00124</b>  | 0.17012             | 0.619577            | 3.080166           | Down                         | 1.614003                   | 5.878193                   |
| 4  | Gpr64      | tcaagatacagctaattggcacct | gagttttgtgagctctgctg    | UPL109                                  | 0.398017564        | <b>0.001321</b> | 0.233627            | 0.678082            | 2.512452           | Down                         | 1.474749                   | 4.280332                   |
| 5  | Igr5       | tcctcactgacaggaactgc     | gaagagatgagatctttgctcca | UPL80                                   | 0.573618406        | <b>0.002927</b> | 0.403662            | 0.815133            | 1.743319           | Down                         | 1.226793                   | 2.477322                   |
| 6  | Hoxa10     | ccttcagaaaacagtaaagcttcg | aagggcagcgtttctcc       | UPL100                                  | 0.383136982        | <b>0.003407</b> | 0.207128            | 0.708711            | 2.610033           | Down                         | 1.411013                   | 4.827928                   |
| 7  | vstm2      | ccagaggacctggagcaa       | cgggtctctgtcgggtaag     | UPL75                                   | 0.497692367        | <b>0.037403</b> | 0.253129            | 0.978543            | 2.009273           | Down                         | 1.021927                   | 3.950555                   |
| 8  | Grb10      | cggttgctcctagctccta      | tgaaagcctggagggaat      | UPL83                                   | 0.570590514        | 0.094375        | 0.287976            | 1.130557            | 1.75257            | Down                         | 0.88452                    | 3.472509                   |
| 9  | Hif1a      | aatggaacggagcaaaagac     | tgtggaatccactctcatcca   | UPL3                                    | 0.504257427        | 0.101347        | 0.214966            | 1.182866            | 1.983114           | Down                         | 0.845405                   | 4.651905                   |
| 10 | Atp13a4    | tctctgggcaaaagtcaag      | gcaccatctccacataacct    | UPL31                                   | 0.583127056        | 0.146588        | 0.272413            | 1.248243            | 1.714892           | Down                         | 0.801126                   | 3.670901                   |
| 11 | Trim2      | ggaggtaacatagtgtctcaaac  | gaagttgctgcagctttaatg   | UPL72                                   | 0.580593436        | 0.148717        | 0.268448            | 1.255696            | 1.722376           | Down                         | 0.796371                   | 3.725119                   |
| 12 | Ppib       | cttcataaccacagtcaagacctc | ctccacctccgtaccacat     | UPL42                                   | 0.603538622        | 0.151013        | 0.30007             | 1.213915            | 1.656895           | Down                         | 0.823781                   | 3.332561                   |
| 13 | Mre11      | ccggaagctcagtggtga       | aatgcgcagcaagcctac      | UPL80                                   | 0.646353657        | 0.203495        | 0.319232            | 1.308681            | 1.547141           | Down                         | 0.764128                   | 3.132515                   |
| 14 | Rpl4       | agcagccgggtagagagg       | atgactctccccttcggagt    | UPL55                                   | 0.689075276        | 0.354859        | 0.299933            | 1.583102            | 1.45122            | Down                         | 0.631671                   | 3.334077                   |
| 15 | sprx       | caacaaggctggagtgg        | gggcacttgattctaggaggt   | UPL75                                   | 0.750096353        | 0.443395        | 0.344974            | 1.630978            | 1.333162           | Down                         | 0.613129                   | 2.898772                   |
| 16 | Spo11      | ggctcctggcagacaact       | cagatctggaacgcccttt     | UPL18                                   | 0.754411985        | 0.448996        | 0.362435            | 1.570315            | 1.325536           | Down                         | 0.636815                   | 2.759115                   |
| 17 | Hoxa9      | tcctgactgactatgcttggtg   | gttgcaagccgggttatt      | UPL25                                   | 0.769580065        | 0.507932        | 0.338985            | 1.747138            | 1.29941            | Down                         | 0.572365                   | 2.949983                   |
| 18 | Pgdf1      | ccaaaacaggctccacctat     | cgggttcaggtagacaacatc   | UPL7                                    | 0.800711908        | 0.542305        | 0.375851            | 1.705836            | 1.248889           | Down                         | 0.586223                   | 2.660631                   |
| 19 | Rgnf       | ccagcgaagaacagagatca     | cccattctctctgaaatcc     | UPL2                                    | 0.866490998        | 0.738122        | 0.35571             | 2.110729            | 1.15408            | Down                         | 0.47377                    | 2.811281                   |
| 20 | dgk2       | gcctccctcatgaagacaga     | cgctggatcatctggtaatg    | UPL80                                   | 0.95164034         | 0.881132        | 0.477799            | 1.895398            | 1.050817           | Down                         | 0.527594                   | 2.09293                    |
| 21 | Hoxd10     | ctgaggttccgtgtccagt      | ttggagtatcagactgatttctc | UPL2                                    | 0.976672987        | 0.952775        | 0.426507            | 2.236518            | 1.023884           | Down                         | 0.447124                   | 2.344628                   |
| 22 | Sult4a     | ggggctggacatcatcaa       | agagggcaggaagcggtg      | UPL10                                   | <b>2.630203534</b> | <b>3.00E-09</b> | 2.027477            | 3.412108            | 2.630204           | Up                           | 2.027477                   | 3.412108                   |
| 23 | Rap2IP     | agctttgtccagaccacct      | tctagcagggttttcacagaga  | UPL45                                   | <b>7.948129249</b> | <b>2.36E-07</b> | 4.007745            | 15.76267            | 7.948129           | Up                           | 4.007745                   | 15.76267                   |
| 24 | Slc2a9     | ttccaacggctacttggtgt     | aggctccgaggagagctc      | UPL72                                   | <b>2.038252098</b> | 0.10701         | 0.827093            | 5.022982            | 2.038252           | Up                           | 0.827093                   | 5.022982                   |
| 25 | Spry4      | tacacagacgtggagcgatg     | caccaagggacaggcttcta    | UPL17                                   | <b>1.002000959</b> | 0.985829        | 0.797453            | 1.259015            | 1.002001           | Up                           | 0.797453                   | 1.259015                   |
| 26 | Hoxd9      | ctcagctgacgcatca         | ttcgctgcagggttgttt      | UPL63                                   | <b>1.00138552</b>  | 0.996851        | 0.482949            | 2.076355            | 1.001386           | Up                           | 0.482949                   | 2.076355                   |
| 27 | Eef1a1     | acacgtagattccggcaagt     | aggagccctttccatctc      | UPL31                                   | Endogenous control |                 |                     |                     |                    |                              |                            |                            |
| 28 | Mil5       | tcagcacatctgaagatggaa    | caggaatatgctgctgtca     | SYBR                                    | 0.000417317        | <b>0.006623</b> |                     |                     |                    | Down                         |                            |                            |
| 29 | Pgk1       | tacctgctggctggatgg       | cacagcctggcatalttct     | SYBR                                    | Endogenous control |                 |                     |                     |                    |                              |                            |                            |
